# Supplementary material
Source: PubMed Central journal article supplement (PMC10011205)
Supplement: mmc1.pdf [file mmc1.pdf]

# THE LANCET

## Neurology

### Supplementary appendix

This appendix formed part of the original submission and has been peer reviewed.  
We post it as supplied by the authors.

Supplement to: Benedict RHB, Amato MP, DeLuca J, Geurts JGG. Cognitive impairment in multiple sclerosis: clinical management, MRI, and therapeutic avenues. *Lancet Neurol* 2020; **19**: 860–71.

Supplement. Table of Conventional person-administered neuropsychological tests and computer-assisted tests of cognitive processing speed (CPS) and memory frequently used in MS publications.

Conventional tests are fully vetted and validated in multiple sclerosis samples<sup>1-4</sup> demonstrating good reliability and validity.

|                                                          | <b>Cognitive Domain</b>  | <b>Stimulus</b>                             | <b>Mode of Response</b>                       | <b>Equipment Needed Other Than Response Form</b> | <b>Time in min.</b> |
|----------------------------------------------------------|--------------------------|---------------------------------------------|-----------------------------------------------|--------------------------------------------------|---------------------|
| <b><i>Conventional Psychometric Tests</i></b>            |                          |                                             |                                               |                                                  |                     |
| Symbol Digit Modalities Test <sup>5</sup>                | CPS; Learning            | Paper Visual Display, Symbol Number Pairs   | Oral Speech                                   | None                                             | 5                   |
| Paced Auditory Serial Addition Test <sup>6</sup>         | CPS; Working Memory      | Recorded Auditory Numbers                   | Oral Speech                                   | Computer or Other Sound Player                   | 5                   |
| Controlled Oral Word Association Test <sup>7</sup>       | CPS; Word Retrieval      | None                                        | Oral Speech                                   | None                                             | 5                   |
| Semantic Verbal Fluency <sup>7</sup>                     | CPS; Word Retrieval      | None                                        | Oral Speech                                   | None                                             | 2                   |
| Stroop Color Word Test <sup>8</sup>                      | CPS; Response Inhibition | Paper Visual Display, Single Words          | Oral Speech                                   | None                                             | 10                  |
| Rey Auditory Verbal Learning Test <sup>9</sup>           | Learning and Memory      | Person Spoken Word List                     | Oral Speech                                   | None                                             | 10                  |
| California Verbal Learning Test <sup>10</sup>            | Learning and Memory      | Person Spoken Word List                     | Oral Speech                                   | None                                             | 10                  |
| Selective Reminding Test <sup>11</sup>                   | Learning and Memory      | Person Spoken Word List                     | Oral Speech                                   | None                                             | 10                  |
| Brief Visuospatial Memory Test Revised <sup>12, 13</sup> | Learning and Memory      | Paper Visual Display, 2x3 Matrix of Figures | Manual Paper and Pencil Renderings of Figures | None                                             | 5                   |
| 10/36 Visual Recall Test <sup>14</sup>                   | Learning and Memory      | Checkboard, 10 Spaces Highlighted           | Manual Placement of Checkers                  | Checkerboard Key                                 | 5                   |

| <b>Computerized Neuropsychological Assessments</b>               |                                                 |                                                                             |                                  |                           |    |
|------------------------------------------------------------------|-------------------------------------------------|-----------------------------------------------------------------------------|----------------------------------|---------------------------|----|
| CogState Detection Task <sup>15</sup>                            | CPS; Manual Response Speed/Psychomotor Function | Screen Visual Display, Playing Cards                                        | Computer Keyboard or Touchscreen | Personal Computer or iPad | 2  |
| Computerized Symbol Digit Modalities Test <sup>16</sup>          | CPS                                             | Screen Visual Display, Symbol Number Pairs                                  | Oral Speech                      | Personal Computer         | 2  |
| Computerized Speed Cognitive Test <sup>17</sup>                  | CPS                                             | Screen Visual Display, Symbol Number Pairs                                  | Oral Speech                      | Personal Computer         | 2  |
| Processing Speed Test <sup>18</sup>                              | CPS                                             | Screen Visual Display, Symbol Number Pairs                                  | Touchscreen                      | iPad                      | 5  |
| CNS Vital Signs Processing Speed Test <sup>19</sup>              | CPS; Visual Perception; Manual Response Speed   | Screen Visual Display, Symbol Number Pairs                                  | Computer Keyboard                | Personal Computer         | 4  |
| NeuroTrax Information Processing Speed Test <sup>20</sup>        | CPS                                             | Screen Visual Display, Single Digit Numbers and Basic Arithmetic Problems   | Mouse Click                      | Personal Computer         | 5  |
| Computerized Test of Information Processing <sup>21</sup>        | CPS; Manual Response Speed/Reaction Time        | Screen Visual Display, Single Letters and Words Presented Consecutively     | Computer Keyboard                | Personal Computer         | 15 |
| NeuroTrax Memory Composite <sup>20</sup>                         | Learning and Memory                             | Screen Visual Display, Word Pairs, 2X4 Matrix of Figures                    | Computer Keyboard                | Personal Computer         | 10 |
| CNS Vital Signs Composite Memory <sup>19</sup>                   | Learning and Memory                             | Screen Visual Display, Word List and Geometric Figures Shown One-at-a-time  | Computer Keyboard                | Personal Computer         | 6  |
| CogState One Card Learning Test <sup>15</sup>                    | Learning and Memory                             | Screen Visual Display, Playing Cards                                        | Computer Keyboard or Touchscreen | Personal Computer or iPad | 6  |
| CogState Continuous Paired Associate Learning Test <sup>15</sup> | Learning and Memory                             | Screen Visual Display, Masked Abstract Patterns Surrounding Center Stimulus | Computer Keyboard or Touchscreen | Personal Computer or iPad | 7  |

---

|                                                      |                     |                                                                                      |             |                                                                |   |
|------------------------------------------------------|---------------------|--------------------------------------------------------------------------------------|-------------|----------------------------------------------------------------|---|
| CANTAB Paired Associates Learning Test <sup>22</sup> | Learning and Memory | Screen Visual Display,<br>Masked Abstract<br>Patterns Surrounding<br>Center Stimulus | Touchscreen | iPad (previously<br>a touch-sensitive<br>personal<br>computer) | 8 |
|------------------------------------------------------|---------------------|--------------------------------------------------------------------------------------|-------------|----------------------------------------------------------------|---|

---

Please see Wojcik et al<sup>23</sup> for a detailed review of computer-assisted testing approaches. Some computer-based tests are less subject to ceiling and floor effects because they vary the test difficulty based on performance.

1. Benedict RHB, Cookfair D, Gavett R, et al. Validity of the Minimal Assessment of Cognitive Function in Multiple Sclerosis (MACFIMS). *Journal of the International Neuropsychological Society* 2006; 12: 549-558.
2. Benedict RHB, Fischer JS, Archibald CJ, et al. Minimal Neuropsychological Assessment of MS Patients: A Consensus Approach. *Clinical Neuropsychologist* 2002; 16: 381-397.
3. Strober L, Englert J, Munschauer F, et al. Sensitivity of conventional memory tests in multiple sclerosis: comparing the Rao Brief Repeatable Neuropsychological Battery and the Minimal Assessment of Cognitive Function in MS. *Mult Scler* 2009; 15: 1077-1084. 2009/06/27.
4. Portaccio E, Goretti B, Zipoli V, et al. Reliability, practice effects, and change indices for Rao's Brief Repeatable Battery. *Mult Scler* 2010; 16: 611-617. 2010/03/09. DOI: 1352458510362818 [pii]  
10.1177/1352458510362818.
5. Smith A. *Symbol digit modalities test: Manual*. Los Angeles: Western Psychological Services, 1982.
6. Gronwall DMA. Paced auditory serial addition task: A measure of recovery from concussion. *Perceptual and Motor Skills* 1977; 44: 367-373.
7. Borkowski JG, Benton AL and Spreen O. Word fluency and brain damage. *Neuropsychologia* 1967; 5: 135-140.
8. Golden CJ. *The Stroop Color Word Test: A Manual for Clinical and Experimental Uses*. Chicago: Stoelting, 1978.
9. Rey A. *L'Examen Clinique en Psychologie*. Paris: Press Universitaire de France, 1964.
10. Delis DC, Kramer JH, Kaplan E, et al. *California Verbal Learning Test - Second Edition*. San Antonio, TX: The Psychological Corporation, 2000.
11. Buschke F and Fuld PA. Evaluating storage, retention, and retrieval in disordered memory and learning. *Neurology* 1974; 24: 1019-1025.
12. Benedict RHB. *Brief Visuospatial Memory Test - Revised: Professional Manual*. Odessa, Florida: Psychological Assessment Resources, Inc., 1997.
13. Benedict RHB, Schretlen D, Groninger L, et al. Revision of the Brief Visuospatial Memory Test: Studies of normal performance, reliability, and validity. *Psychological Assessment* 1996; 8: 145-153.
14. Rao SM. *A Manual for the Brief, Repeatable Battery of Neuropsychological Tests in Multiple Sclerosis*. National Multiple Sclerosis Society, 1991.
15. Maruff P, Lim YY, Darby D, et al. Clinical utility of the cogstate brief battery in identifying cognitive impairment in mild cognitive impairment and Alzheimer's disease. *BMC psychology* 2013; 1: 30. 2013/01/01. DOI: 10.1186/2050-7283-1-30.
16. Akbar N, Honarmand K, Kou N, et al. Validity of a computerized version of the Symbol Digit Modalities Test in multiple sclerosis. *Journal of Neurology* 2011; 258: 373-379. Article. DOI: 10.1007/s00415-010-5760-8.
17. Ruet A, Deloire MS, Charré-Morin J, et al. A new computerised cognitive test for the detection of information processing speed impairment in multiple sclerosis. *Multiple Sclerosis Journal* 2013; 19: 1665-1672.

18. Achiron A, Doniger GM, Harel Y, et al. Prolonged response times characterize cognitive performance in multiple sclerosis. *European Journal of Neurology* 2007; 14: 1102-1108. Comparative Study.
19. Papathanasiou A, Messinis L, Georgiou VL, et al. Cognitive impairment in relapsing remitting and secondary progressive multiple sclerosis patients: Efficacy of a computerized cognitive screening battery. *ISRN Neurology* 2014; 2014. Article. DOI: 10.1155/2014/151379.
20. Golan D, Doniger GM, Wissemann K, et al. The impact of subjective cognitive fatigue and depression on cognitive function in patients with multiple sclerosis. *Multiple Sclerosis Journal* 2018; 24: 196-204.
21. Hughes AJ, Denney DR and Lynch SG. Reaction time and rapid serial processing measures of information processing speed in multiple sclerosis: Complexity, compounding, and augmentation. *Journal of the International Neuropsychological Society* 2011; 17: 1113-1121. DOI: 10.1017/S1355617711001135.
22. Cabeça HLS, Rocha LC, Sabba AF, et al. The subtleties of cognitive decline in multiple sclerosis: an exploratory study using hierarchical cluster analysis of CANTAB results. *BMC Neurol* 2018; 18: 140. 2018/09/12. DOI: 10.1186/s12883-018-1141-1.
23. Wojcik CM, Beier M, Costello K, et al. Computerized neuropsychological assessment devices in multiple sclerosis: A systematic review. *Mult Scler* 2019; 25: 1848-1869. 2019/10/23. DOI: 10.1177/1352458519879094.
